# Supplementary material for: Evaluation of the adverse events following immunization surveillance system, Ghana, 2019
Source: PubMed Central journal article supplement (PMC8887767; doi:10.1371/journal.pone.0264697), 2022-03-01
Supplement: pone.0264697.s005.pdf [file pone.0264697.s005.pdf]

The Academic Editor  
PLOS ONE

Dear Sir

**Evaluation of the Adverse Events Following Immunization Surveillance System, Ghana, 2019 (PONE-D-21-21870)**

Thank you for the review and providing comments to improve our manuscript. The table below are responses to specific comments made by the reviewers.

| COMMENT                                                     | CORRECTIONS MADE                                                                                                                 |
|-------------------------------------------------------------|----------------------------------------------------------------------------------------------------------------------------------|
| <b>RESULTS</b>                                              |                                                                                                                                  |
| The case definitions, should be within the Methods Section. | The AEFI case definitions, have been put under data collection within the Methods Section. This can be seen in lines 132 to 142. |

Thank you for your comments and inputs.

Sincerely,



.....
